# Supplementary material for: Bi-Directional Interactions between Glucose-Lowering Medications and Gut Microbiome in Patients with Type 2 Diabetes Mellitus: A Systematic Review
Source: Genes (Basel). 2023 Aug 1;14(8):1572. doi: 10.3390/genes14081572 (PMC10454120; doi:10.3390/genes14081572)
Supplement: Supplementary file 1 [file genes-14-01572-s001.zip › Supplementary Tables S1-S3.xlsx]

## Sheet: Table S1
Table S1. Summary of observational studies that were included in section "Gut microbiome changes associated with glucose-lowering drugs"
Year	Author	Drug	Study Population/Country	Sample size		Increased taxa associated with treatment	Decreased taxa associated with treatment	Effect on alpha diversity	Effect on beta diversity	Treatment duration	Sequencing type	Bioinformatic processing pipeline	Reference genome for taxa mapping	Differential abundant taxa identification method	Taxa normalization method
				Treatment group	Control group
2019	Fanghua Zhang	Metformin	Chinese	N=51	N=26	Spirochaete and Turicibacter	Erysipelotrichi and Ruminococcus	No effect	Yes (Unweighted UniFrac distance)	>3 months	16s V1-V2	QIIME pipeline	2013 Greengenes (13.8 release) ribosomal databases	Mann–Whitney U test	Rarefication
2015	Kristoffer Forslund	Metformin	Denmark	N=93	N=106	Escherichia spp.	Intestinibacter spp	NA	NA	NA	metagenomics	LotuS pipeline	SILVA 119 rRNA database	Mann–Whitney-U or Kruskal–Wallis test	Rarefication + Total sample sum scaling
2017	Jacobo Cuesta-Zuluaga	Metformin	Colombian	N=14	N=14	Prevotella (Bacteroidetes|Prevotellaceae|OTU028),Megasphaera (Firmicutes|Veillonellaceae|OTU069)	Oscillospira (Firmicutes|Ruminococcaceae|OTU024), Barnesiellaceae (Bacteroidetes|OTU102), and OTU of Clostridiaceae 02d06 (Firmicutes|Clostridiaceae|OTU080)	NA	Yes	NA	16s V4	NA	NA	LEfSe	Rarefication
2018	Lulu Sun	Metformin	Chinese	N=30	self-control	NA	Bacteroides fragilis	Decreased	Yes	1000mg/2/day,3 days	metagenomics	NA	NA	Partial least square discriminant analysis (PLS-DA)	Normalized by gene length
2014	Antonella Napolitano	Metformin	United Kingdom	n=14	self-control	NA	NA	NA	No effect	1000 mg/day, >3 months	16s V1-V3	QIIME pipeline	Greengenes 16S rRNA database	ANOVA	Rarefication
2020	Ilze Elbere	Metformin	Latvia	n=50	self-control	o__Bifidobacteriales, f__Bifidobacteriaceae, g__Bifidobacterium, s__Bifidobacterium_adolescentis, t__Bifidobacterium_adolescentis_unclassified, g__Barnesiella, s__Barnesiella_intestinihominis, s__Clostridium_bartlettii	f__Clostridiaceae, g__Lactococcus, g__Clostridium, s__Parabacteroides_distasonis, t__Parabacteroides_distasonis_unclassified, s__Lactococcus_lactis, t__Lactococcus_lactis_unclassified, f__Oscillospiraceae, g__Oscillibacter, s__Oscillibacter_unclassified, s__Enterococcus_faecium, t__Enterococcus_faecium_unclassified, s__Bacteroides_vulgatus, t__Bacteroides_vulgatus_unclassified, f__Enterococcaceae…	No effect	NA	7 days , dose–determined by an endocrinologist	metagenomics	HUMAnN2, MetaPhlAn2	Default database	Sparse Partial least squares discriminant analysis (sPLS-DA)	limma+voom
2020	Hanako Nakajima	Metformin	Japan	n=31	self-control	NA	NA	No effect	No effect	4 weeks	16s V3-V4	QIIME pipeline	NA	LEfSe	Rarefication
				N=21(subset)	self-control	NA	the ratio of the Firmicutes and Bacteroidetes	No effect	No effect	4 weeks
2019	Fanghua Zhang	α-GI	Chinese	N=17	N=26	Bifidobacterium and Lactobacillus	NA	No effect	Yes (Unweighted UniFrac distance)	>3 months	16s V1-V2	QIIME pipeline	2013 Greengenes (13.8 release) ribosomal databases	Mann–Whitney U test	Rarefication
2021	Fumie Takewaki	α-GI	Japanese	N=18	self-control	Actinobacteria, Bifidobacterium, Eubacterium, Megasphaera, and Lactobacillus	Bacteroides, Blautia, Prevotella, Clostridium, Phascolarctobacterium, and Lachnoclostridium	No effect	No effect(UniFrac distance)	4 weeks	16s V3-V4	QIIME pipeline	NA	Paired t-test	Rarefication
2021	Junjie Shang	Liraglutide/GLP-1RA	Chinese	n=40	self-control	Streptococcaceae, Bacilli, Verrucomicrobia, Coriobacteriia, Coriobacteriaceae, Collinsella, Akkermansia, Verrucomicrobiaceae, Coriobacteriales, Lactobacillales, Verrucomicrobiae, Clostridium, Clostridiaceae, Verrucomicrobiales, Actinobacteria	Acinetobacter, Oscillospira, Desulfovibrionales, S24_7, Fusobacteriaceae, Rikenellaceae, Pseudomonadaceae, Pseudomonadales, Desulfovibrionaceae, Acidaminococcus, Fusobacteriales, Succinatimonas, Deltaproteobacteria, Moraxellaceae, Megamonas, Alistipes, Fusobacteria, Fusobacterium,Megasphaera	richness reduced,no big changes in Shannon and Simpson index	Yes (Bray-Curtis distances and unweighted UniFrac distances ), No (weighted distance)	4 months	16s V4	QIIME pipeline	Greengenes database	LEfSe	NA

## Sheet: Table S2
Table S2. Summary of RCT studies that were included in section "Gut microbiome changes associated with glucose-lowering drugs"
Year	Author	Drug	Study population/country	Sample size		Increased taxa associated with treatment	Decreased taxa associated with treatment	Effect on alpha diversity	Effect on beta diversity	Treatment duration	Sequencing type	Bioinformatic processing pipeline	Reference genome for taxa mapping	Differential abundant taxa identification method	Taxa normalization method
				Treatment group	Control group
2018	Xiaolin Tong	Metformin	Chinese	n=100	self-control	Clostridium XIVa, Erysipelotrichaceae incertae sedis, Escherichia/Shigella, Fusobacterium, Flavonifractor,Clostridium XVIII and IV,Blautia spp., and Anaerostipes	Bacteroides, Parabacteroides, Alistipes, Oscillibacter, and un-Ruminococcaceae	Increased	No effect	12 weeks	16s V3-V4	USEARCH v.7.0.1090 pipeline	NA	Wilcoxon’s signed-rank test (paired samples), Mann-Whitney U test (independent samples)	Rarefication
2017	Hao Wu	Metformin	Sweden	n=22	n=18	γ-Proteobacteria,Escherichia coli, and Firmicutes	Intestinibacter	NA	NA	1,700 mg/d, 4 months	metagenomics	MEDUSA pipeline	NA	DESeq2	NA
2017	Yanyun Gu	Acarbose/α-GI	Chinese	n=51	self-control	Lactobacillus and Bifidobacterium	Bacteroides, Alistipes and Clostridium	Decreased	NA	3 months	metagenomics	mOTUs (https://motu-tool.org/)	NA	Paired Wilcoxon rank-sum test	NA
2017	Yanyun Gu	Glipizide/Sulfonylureas	Chinese	n=43	self-control	no significant changes at gene level or mOTU level	No significant changes at gene level or mOTU level	No effect	NA	3 months	metagenomics	mOTUS (https://motu-tool.org/)	NA	Paired Wilcoxon rank-sum test	NA
2020	van Bommel EJM	Dapagliflozin/SGLT2 Inhibitor	Netherlands	n=24	self-control	NO CHANGES	NO CHANGES	No effect	No effect	10 mg,12 weeks	16s V3-V4	NA	NA	DESeq2	Rarefication
2020	van Bommel EJM	Gliclazide/Sulfonylureas	Netherlands	n=20	self-control	NO CHANGES	NO CHANGES	No effect	No effect	30 mg, 12 weeks	16s V3-V4	NA	NA	DESeq2	Rarefication
2022	Xiuying Zhang	Acarbose/α-GI	China	n=44	self-control	Bifidobacterium, Lactobacillus, Solobacterium, Streptococcus, Actinomyces, Acidaminococcus, Megasphaera, Veillonella, Haemophilus, Granulicatella, Collinsella, Gemella, Anaerostipes, Rothia, Enterococcus, and 30 species	Bacteroides, Roseburia, Alistipes, Bilophila, Oscillibacter, Parabacteroides, Clostridium, Odoribacter, Holdemania, Adlercreutzia, Barnesiella, Flavonifractor, Subdoligranulum, Ruminococcus, Oxalobacter, Parasutterella, Anaerotruncus, Akkermansia, and 46 species	Decreased	Yes	6 months	metagenomics	MetaPhlAn2 v2.7.0 and HUMAnN2 v0.11.1	NA	Generalised estimating equations model for taxa detection associated with treatment; sparse partial least squares discriminant analysis (sPLS-DA) for taxa detection associated with high/low treatment response	Centered log-ratio transformation
2022	Xiuying Zhang	Vildagliptin/DPP-4 Inhibitor	China	n=48	self-control	Bifidobacterium, and 2 species (Clostridium bartlettii, and Bifidobacterium adolescentis)	Paraprevotella, Fusobacterium, Parabacteroides, Bacteroides, and 8 species	No effect	No effect	6 months	metagenomics	MetaPhlAn2 v2.7.0 and HUMAnN2 v0.11.1	NA	Generalised estimating equations model for taxa detection associated with treatment; sparse partial least squares discriminant analysis (sPLS-DA) for taxa detection associated with high/low treatment response	Centered log-ratio transformation

## Sheet: Table S3
Table S3. Summary of studies that were included in section "Effects of gut microbiome on glycemic control of glucose-lowering drugs"
Study type	Year	Author	Drug	Study population/country	Sample size		Taxa positively correlate with glycemic control	Taxa negatively correlate with glycemic control	If alpha diversity influence glycemic control	Treatment duration	Sequencing type	Bioinformatic processing pipeline	Reference genome for taxa mapping	Differential abundant taxa identification method	Taxa normalization method
					Treatment group	Control group
Observational study	2020	Elbere Ilze	Metformin	Latvian	n=46	self-control	Enterococcus faecium, Lactococcus lactis, Odoribacter, and Dialister	Prevotella copri	No	metformin dose–determined by an endocrinologist, 7 days	metagenomics	HUMAnN2, MetaPhlAn2	Default database	Sparse Partial least squares discriminant analysis (sPLS-DA)	limma+voom
RCT	2018	Xiaolin Tong	Metformin	Chinese	n=100	self-control	Blautia, Anaerostipes, Clostridium XIVa, Erysipelotrichaceae incertae sedis, Escherichia/Shigella, Fusobacterium, Flavonifractor, Lachnospiraceae, Lachnospiracea incertae sedis, Clostridium XVIII and IV	Bacteroides, Parabacteroides, Alistipes, Oscillibacter, and un-Ruminococcaceae	NA	12 weeks	16s V3-V4	USEARCH v.7.0.1090 pipeline	NA	Wilcoxon’s signed-rank test (paired samples), Mann-Whitney U test (independent samples)	Rarefication
RCT	2020	van Bommel EJM	Dapagliflozin/SGLT2 Inhibitor	Netherlands	n=24	self-control	Not associated	Not associated	NA	10 mg,12 weeks	16s V3-V4	NA	NA	DESeq2	Rarefication
RCT	2020	van Bommel EJM	Gliclazide/Sulfonylureas	Netherlands	n=20	self-control	Not associated	Not associated	NA	30 mg,12 weeks	16s V3-V4	NA	NA	DESeq2	Rarefication
RCT	2022	Xiuying Zhang	Acarbose/α-GI	China	n=44	self-control	Not significant	Not significant	NA	6 months	metagenomics	MetaPhlAn2 v2.7.0 and HUMAnN2 v0.11.1	NA	Generalised estimating equations model for taxa detection associated with treatment; sparse partial least squares discriminant analysis (sPLS-DA) for taxa detection associated with high/low treatment response	Centered log-ratio transformation
RCT	2022	Xiuying Zhang	Vildagliptin/DPP-4 Inhibitor	China	n=48	self-control	Not significant	Not significant	NA	6 months	metagenomics	MetaPhlAn2 v2.7.0 and HUMAnN2 v0.11.1	NA	Generalised estimating equations model for taxa detection associated with treatment; sparse partial least squares discriminant analysis (sPLS-DA) for taxa detection associated with high/low treatment response	Centered log-ratio transformation
